# Supplementary material for: Functional Outlier Detection by Means of h-Mode Depth and Dynamic Time Warping
Source: MDPI journal article supplement (doi:10.3390/app112311475), 2021-12-03
Supplement: s1 [file s1]

Archive with 1 entries (1 files):
- applsci-1434493-supplementary.pdf
